# Supplementary material
Source: publisher site journal article supplement (https://www.spandidos-publications.com/6447/downloadSupplementary)
Supplement: Supplementary file 1 [file downloadSupplementary]

**Table SI.** Crude correlations between variables and coronary artery disease.

| Variable                                 | Value (n=118)     | OR (95% CI)         | P-value |
|------------------------------------------|-------------------|---------------------|---------|
| Age, mean $\pm$ SD, years                | 65.03 $\pm$ 14.18 | 1.09 (1.05, 1.13)   | <0.001  |
| Sex, n (%)                               |                   |                     |         |
| Female                                   | 24 (20.34)        | Reference           |         |
| Male                                     | 94 (79.66)        | 1.34 (0.53, 3.43)   | 0.535   |
| Current smoker, n (%)                    |                   |                     |         |
| No                                       | 70 (59.32)        | Reference           |         |
| Yes                                      | 48 (40.68)        | 0.67 (0.31, 1.46)   | 0.309   |
| Current drinker, n (%)                   |                   |                     |         |
| No                                       | 92 (77.97)        | Reference           |         |
| Yes                                      | 26 (22.03)        | 0.87 (0.35, 2.18)   | 0.766   |
| Lacunar infarcts, n (%)                  |                   |                     |         |
| No                                       | 53 (44.92)        | Reference           |         |
| Yes                                      | 65 (55.08)        | 2.17 (0.99, 4.77)   | 0.053   |
| Peripheral arteriosclerosis, n (%)       |                   |                     |         |
| No                                       | 38 (32.20)        | Reference           |         |
| Yes                                      | 80 (67.80)        | 12.28 (4.90, 30.78) | <0.001  |
| Chronic kidney disease, n (%)            |                   |                     |         |
| No                                       | 106 (89.83)       | Reference           |         |
| Yes                                      | 12 (10.17)        | 2.57 (0.53, 12.37)  | 0.239   |
| Osteoporosis, n (%)                      |                   |                     |         |
| No                                       | 93 (78.81)        | Reference           |         |
| Yes                                      | 25 (21.19)        | 3.03 (0.96, 9.55)   | 0.059   |
| Hypertension, n (%)                      |                   |                     |         |
| No                                       | 18 (15.25)        | Reference           |         |
| Yes                                      | 100 (84.75)       | 1.87 (0.67, 5.19)   | 0.232   |
| Diabetes mellitus, n (%)                 |                   |                     |         |
| No                                       | 83 (70.34)        | Reference           |         |
| Yes                                      | 35 (29.66)        | -a                  | 0.987   |
| Alkaline phosphatase, mean $\pm$ SD, U/l | 73.56 $\pm$ 20.56 | 1.01 (0.99, 1.03)   | 0.576   |
| OPG, mean $\pm$ SD, pg/ml                | 10.20 $\pm$ 7.33  | 1.11 (1.03, 1.19)   | 0.009   |

|                                           |             |                   |        |
|-------------------------------------------|-------------|-------------------|--------|
| sRANKL, mean ± SD, pg/ml                  | 30.70±19.36 | 1.16 (1.09, 1.24) | <0.001 |
| Fasting plasma glucose, mean ± SD, mmol/l |             |                   |        |
| <6.0                                      | 96 (81.36)  | Reference         |        |
| ≥6.0                                      | 22 (18.64)  | 2.47 (0.77, 7.88) | 0.573  |
| LDL-C, mean ± SD, mmol/l                  |             |                   |        |
| <1.6                                      | 23 (19.49)  | Reference         |        |
| ≥1.6                                      | 95 (80.51)  | 0.26 (0.07, 0.93) | 0.038  |
| Total calcium, mean ± SD, mmol/l          |             |                   |        |
| <2.03                                     | 5 (4.24)    | Reference         |        |
| 2.03-2.54                                 | 113 (95.76) | 1.43 (0.23, 8.91) | 0.704  |
| Phosphorus, mean ± SD, mmol/l             |             |                   |        |
| <0.96                                     | 18 (15.25)  | Reference         |        |
| 0.96-1.62                                 | 100 (84.75) | 0.78 (0.26, 2.38) | 0.663  |
| Body mass index, kg/m <sup>2</sup>        |             |                   |        |
| ≥22.48                                    | 105 (88.98) | Reference         |        |
| <22.48                                    | 13 (11.02)  | 1.08 (0.31, 3.75) | 0.765  |

<sup>a</sup>Model failed because of the small sample size. OR, odds ratio; CI, confidence interval; OPG, osteoprotegerin; sRANKL, soluble receptor activator of nuclear factor-κB ligand; LDL-C, low-density lipoprotein-cholesterol.
